# Supplementary material
Source: publisher figshare collection journal article supplement (https://geolsoc.figshare.com/ndownloader/files/14413283)
Supplement: Supplementary file 1 [file 14413283]

## Sheet: Sheet1
Table ES4. Ch13. Brook Street Terrane tuffaceous sediments ICP-MS
NZ17-20	NZ17-23	NZ17-24	NZ17-45	NZ17-46	NZ17-47	NZ17-51	NZ17-66	NZ17-67	NZ17-70	NZ17-71	NZ17-73	NZ17-76	NZ17-78	NZ17-79	NZ17-140	NZ17-142	NZ17-145	NZ17-153	NZ17-155	NZ17-158	NZ17-173	OU35341
Princhester Creek, Southland	Princhester Creek, Southland	Princhester Creek, Southland	Tower Peak Estate, Southland	Tower Peak Estate, Southland	Tower Peak Estate, Southland	Tower Peak Estate, Southland	East Eglinton	East Eglinton	East Eglinton	East Eglinton	East Eglinton	East Eglinton	East Eglinton	East Eglinton	Grampian Formation, Maitai River	Grampian Formation, Maitai River	Grampian Formation, The Grampian	Grampian Formation, The Grampian	Grampian Formation, The Grampian	Grampian Formation, The Grampian	Groom Street Formation, Lud Valley	East Eglinton
N.A.	N.A.	N.A.	N.A.	N.A.	N.A.	N.A.	59G 02 71875 UTM 50 33507	59G 02 71875 UTM 50 33507	59G 02 71875 UTM 50 33507	59G 02 71875 UTM 50 33507	59G 02 71747 UTM 50 33740	59G 02 70285 UTM 50 33645	59G 02 70285 UTM 50 33645	59G 02 70285 UTM 50 33645	59G 06 93551 UTM 54 28330	59G 06 92671 UTM 54 28107	N.A.	59G 06 91107 UTM 54 26296	59G 06 91084 UTM 54 26186	59G 06 91285 UTM 54 26073	59G 06 99427 UTM 54 30885	N.A.
48.47	49.05	52.22	66.02	68.25	74.51	59.4	53.26	53.2	54.7	56.58	54.17	53.19	63.46	55.69	49.33	41.18	56.41	60.25	61.38	64.06	57.54	45.84
16.06	15.87	15.95	15.99	13.26	10.11	14.86	16.02	15.53	12.44	14.27	14.45	15.72	14.79	16.98	15.62	14.63	15.44	17.39	17.09	11	18.57	10.71
9.89	11.22	10.89	4.44	4.05	3.27	9.09	9.86	10.62	8.74	9.75	9.98	10.03	6.29	8.45	9.67	8.2	9.15	6.77	6.83	2.02	6.92	7.72
4.34	3.29	4.86	1.47	1.57	1.47	2.98	4.18	4.67	4.07	4.29	4.23	6.52	1.95	3.95	4.72	4.69	3.54	1.51	1.92	0.55	2.19	4.75
12.8	16.24	8.73	4.87	6.23	4.79	5.59	8.75	9.04	9.74	7.84	9.98	5.07	6.39	5.51	10.87	14.93	7.13	1.13	1.75	11.11	5.5	21.24
3.66	0.04	1.54	0.75	0.21	1.51	3.64	3.49	2	2.31	2.01	2.72	3.46	3.93	3.32	2.16	3.22	2.95	3.96	2.35	1.11	1.37	0.41
0.2	0.01	1.11	2.78	2.4	1.14	0.18	0.64	0.07	0.47	0.33	0.32	1.36	0.31	1.5	0.77	1.05	1.12	3.24	2.74	1.9	1.13	0.14
0.79	0.94	0.94	0.68	0.67	0.45	0.98	0.82	0.88	0.87	0.89	1.07	0.92	0.71	0.84	0.73	0.65	0.85	0.77	0.79	0.24	0.75	0.47
0.1	0.16	0.15	0.09	0.11	0.07	0.15	0.09	0.11	0.14	0.12	0.14	0.16	0.2	0.19	0.19	0.14	0.14	0.07	0.07	0.05	0.09	0.07
0.16	0.19	0.21	0.08	0.07	0.06	0.2	0.18	0.17	0.16	0.17	0.14	0.17	0.13	0.16	0.16	0.17	0.15	0.05	0.05	0.03	0.09	0.13
0.007	0.004	0.004	<0.002	<0.002	<0.002	<0.002	0.005	0.008	0.005	0.005	0.005	0.013	<0.002	0.007	0.016	0.012	0.007	0.009	0.008	<0.002	0.005	0.032
13	2	152	141	98	45	44	53	19	55	44	20	125	39	168	94	226	121	524	390	190	157	25
21	<20	<20	<20	<20	<20	<20	<20	<20	<20	<20	<20	33	<20	<20	53	30	24	24	27	<20	<20	62
32	33	33	12	12	11	25	34	34	31	32	36	35	22	29	28	23	27	12	15	5	20	26
3.3	2.8	3.2	2.7	3.1	2.5	2.7	2.5	3.5	6.1	3.5	2.5	3.2	1.7	3.2	5.5	10.9	2.9	4.6	4.8	7.9	5.6	8.3
99.73	99.79	99.8	99.84	99.89	99.88	99.82	99.79	99.79	99.76	99.74	99.7	99.78	99.86	99.82	99.79	99.79	99.8	99.85	99.85	99.93	99.81	99.78
<1	<1	<1	<1	1	<1	3	<1	1	2	<1	<1	<1	<1	2	<1	2	<1	2	2	2	1	<1
36.6	38.4	39.2	13.2	12.8	107.1	21.4	31.5	31.1	50.4	34.3	25.9	34.1	28.1	32.1	32.6	25.7	52.1	14.5	12	8	35.8	33.9
<0.1	<0.1	<0.1	1.3	0.8	0.4	<0.1	<0.1	<0.1	<0.1	<0.1	<0.1	0.4	<0.1	0.4	0.3	1.9	0.8	2.3	6	3.3	1.4	<0.1
20	22	18	14.2	11.3	8.8	17.9	16.5	17.9	14.3	15.2	17.2	14.3	16.1	12.9	16.7	16.1	17.3	21	21.7	13.2	18.5	9.5
1.3	1.9	2.4	10.2	6.7	3.8	4.1	1.7	2	1.6	1.9	2.2	1.8	2.6	1.9	1.8	1.2	2.7	5.9	5.5	4.7	4.2	0.8
0.8	1.4	1.8	3.5	1.9	1.7	2.1	1.1	0.9	0.9	1	1.1	0.7	0.9	1.2	2.6	1.7	2.6	10.9	11.5	7.7	4.8	0.4
1.7	<0.1	13.5	47.6	30.4	40.7	1.4	5.8	0.5	4.6	3.4	4.4	20	3.9	28	16.1	35.7	26.2	79.3	113.6	77.9	35.7	1.1
<1	<1	<1	3	1	<1	1	<1	<1	<1	<1	<1	<1	<1	<1	<1	<1	1	4	4	3	2	<1
866.7	558.4	222.4	337.2	160.2	230.7	485.4	515.5	372.5	638.5	819.5	1197.2	185.8	468.8	326.8	382.1	379.9	465.1	364.6	267.2	136.9	403.3	219.9
0.2	0.3	0.3	0.4	0.2	1.8	0.3	1.1	0.7	0.6	0.8	0.7	0.6	1.4	0.8	0.6	0.5	0.8	1	0.9	0.7	1	2.4
0.3	0.4	0.5	2.3	1.1	1.1	1.5	0.3	0.4	0.4	0.6	0.5	0.4	0.5	0.6	2.1	1.2	1.1	12.2	13.2	11.7	6.8	0.6
0.2	0.2	0.3	1.2	0.6	0.6	0.6	0.2	0.2	0.2	0.2	0.2	0.2	0.3	0.2	0.6	0.4	0.4	2.9	3.1	3.1	1.7	0.2
328	356	322	50	56	70	173	309	300	312	326	325	290	125	226	275	298	246	153	144	33	240	223
91.2	116.4	60.1	146.4	120.8	205.7	80.8	76.9	57.1	54.5	70.5	65.6	48.7	134.6	74.5	44.3	29.7	73.8	12.7	14.7	85.8	64.9	199.3
46.7	64.3	80.4	361.1	240.5	134.2	151.8	55	66.7	56.4	69.1	72.5	61.8	82.6	70.8	61.3	42.6	90.1	207.5	200	140.6	152.8	27.3
15.7	18.4	21.4	52.9	38.1	21.8	41.5	17.3	22	19.5	21.1	21.3	22.5	25.7	20.9	19.9	16.2	25.7	18.7	22.2	31	27.5	11.5
3.6	5.8	6.6	13	6.9	6.1	9.6	4.2	4.5	5	5.5	5.5	4.8	5.1	6	8.7	7.1	7.3	14.1	17.3	23.8	19.1	3.7
10	13.9	16	35.7	20.5	15.5	23.6	8.8	10.5	11.4	11.9	12.9	11.5	13.6	15.2	18.5	14.7	17.3	32.3	44.4	51.8	40.7	7.7
1.61	2.32	2.49	5.37	3.37	2.32	3.75	1.49	1.82	1.85	2.1	2.05	1.88	2.24	2.36	2.67	2.11	2.62	3.42	4.43	6.82	5.04	1.16
8.3	11.1	12	25.2	16.7	10.3	18.3	7.2	9.1	9	10	10.5	9.5	11.2	12.4	12.2	9.6	12.4	13.5	16.9	26.4	20.6	5.3
2.26	3.17	3.02	6.42	4.6	2.87	5.42	2.23	2.72	2.61	2.89	2.95	2.88	3.33	3.03	3.01	2.23	3.45	2.91	3.59	5.95	4.72	1.51
0.88	1.13	1.03	1.26	0.9	0.67	1.47	0.96	0.99	1.11	1.03	1.06	0.93	1.11	1.14	0.97	0.99	1.07	0.58	0.83	0.56	1.59	0.5
2.64	3.54	3.55	7.58	5.5	3.18	6.33	2.91	3.58	3.19	3.53	3.72	3.56	4.01	3.7	3.47	2.84	4.32	2.87	3.6	6.07	4.94	1.79
0.43	0.57	0.6	1.34	0.96	0.59	1.11	0.49	0.63	0.53	0.6	0.62	0.61	0.69	0.6	0.56	0.46	0.7	0.48	0.61	0.93	0.79	0.31
2.64	3.53	3.81	8.76	6.15	3.77	7.14	3.03	4	3.43	3.75	3.8	3.94	4.41	3.87	3.31	2.76	4.45	2.9	3.81	5.88	4.94	1.95
0.59	0.75	0.75	1.85	1.4	0.84	1.58	0.68	0.88	0.74	0.85	0.85	0.83	0.97	0.82	0.77	0.61	0.95	0.72	0.82	1.17	1.09	0.4
1.67	2.08	2.16	6.12	4.23	2.66	4.58	2.06	2.71	2.14	2.44	2.49	2.4	2.98	2.57	2.27	1.74	2.82	2.42	2.68	3.4	3.21	1.26
0.24	0.31	0.33	0.86	0.62	0.37	0.65	0.29	0.36	0.32	0.35	0.34	0.35	0.39	0.35	0.31	0.24	0.43	0.37	0.42	0.5	0.45	0.18
1.47	1.95	2.04	5.85	4.06	2.57	4.1	1.84	2.34	1.99	2.14	2.23	2.39	2.6	2.37	2.11	1.62	2.74	2.69	2.77	3.14	2.98	1.15
0.25	0.31	0.32	0.89	0.64	0.41	0.69	0.3	0.38	0.29	0.33	0.36	0.36	0.41	0.35	0.31	0.25	0.41	0.45	0.47	0.48	0.48	0.19
0.3	<0.02	<0.02	<0.02	<0.02	0.02	0.02	0.04	0.03	0.96	0.12	0.03	<0.02	0.03	0.1	0.57	2.29	0.02	0.11	0.11	1.75	0.15	1.89
0.48	<0.02	<0.02	<0.02	<0.02	<0.02	<0.02	<0.02	<0.02	0.09	<0.02	<0.02	0.15	<0.02	<0.02	0.04	<0.02	<0.02	<0.02	<0.02	0.03	0.07	0.05
0.3	0.3	0.2	0.3	0.6	0.2	0.3	<0.1	<0.1	0.1	0.1	<0.1	0.2	0.2	0.2	0.3	0.1	0.3	0.4	0.4	0.2	0.2	0.1
107.9	15.8	91.8	68.6	74	35.6	49.2	52.6	98.4	119.7	105.6	59.5	124.5	27.1	82.3	113.1	101.1	76.9	26.1	26.9	7.1	64.9	352
1.1	0.5	0.7	2	1.8	2.3	1	1.2	0.9	0.9	1	1.4	0.6	1	0.6	3.5	2.7	1.2	24.3	23	17.1	98.2	1.3
39	42	83	49	38	34	92	56	68	61	77	46	65	64	81	72	54	75	90	99	44	72	28
13.5	12.7	16.5	2.7	2.4	3.2	10	11.6	17.4	12.7	15	11.9	29.1	4.4	16.7	48.1	25	18.8	22.6	25	3.9	19.1	36.9
0.8	<0.5	<0.5	0.6	1	1.2	1.5	0.7	0.8	0.6	<0.5	0.7	<0.5	0.6	<0.5	41.2	15.2	1.7	1.7	3.9	2.7	15.4	8
<0.1	<0.1	<0.1	<0.1	<0.1	0.1	<0.1	<0.1	0.2	0.1	<0.1	0.1	<0.1	<0.1	<0.1	<0.1	<0.1	<0.1	<0.1	0.1	0.2	<0.1	0.1
<0.1	<0.1	<0.1	<0.1	<0.1	<0.1	<0.1	<0.1	<0.1	<0.1	<0.1	<0.1	<0.1	<0.1	<0.1	0.1	<0.1	<0.1	<0.1	0.2	<0.1	0.1	0.2
<0.1	<0.1	<0.1	<0.1	<0.1	<0.1	<0.1	<0.1	<0.1	<0.1	<0.1	<0.1	<0.1	<0.1	<0.1	0.1	<0.1	<0.1	0.5	0.6	0.4	1.1	<0.1
0.1	<0.1	<0.1	<0.1	<0.1	<0.1	<0.1	<0.1	<0.1	<0.1	<0.1	<0.1	<0.1	<0.1	<0.1	<0.1	0.2	<0.1	<0.1	<0.1	<0.1	0.2	0.2
3.5	1.8	<0.5	<0.5	1.4	<0.5	<0.5	<0.5	<0.5	2.9	1.4	3.7	4.5	0.6	0.8	5.7	2.2	3.9	17.1	3.6	6.2	1.5	3.7
<0.01	<0.01	<0.01	<0.01	<0.01	<0.01	<0.01	<0.01	<0.01	<0.01	<0.01	0.01	<0.01	<0.01	<0.01	<0.01	<0.01	<0.01	0.01	0.03	<0.01	<0.01	0.07
<0.1	<0.1	<0.1	0.1	<0.1	<0.1	<0.1	<0.1	<0.1	<0.1	<0.1	<0.1	<0.1	<0.1	<0.1	<0.1	<0.1	<0.1	<0.1	<0.1	<0.1	<0.1	<0.1
0.7	<0.5	<0.5	<0.5	<0.5	<0.5	<0.5	<0.5	<0.5	0.6	<0.5	<0.5	<0.5	<0.5	<0.5	<0.5	<0.5	<0.5	<0.5	<0.5	<0.5	<0.5	<0.5
1.10156	1.0314	0.961832	0.552266	0.547094	0.67811	0.767354	1.15226	0.970039	1.17622	0.986009	0.97837	0.888058	0.928771	1.04103	0.917706	1.20283	0.847446	0.61365	0.705926	0.284915	1.0068	0.929897
49.385	49.3624	60.8314	73.9935	67.3096	61.6088	61.6853	56.6879	58.4494	50.7962	59.1625	53.2228	64.8247	58.9008	65.7885	54.5201	44.6309	60.5016	77.3577	80.6513	47.373	72.9953	33.0964
49.0831	49.347	58.3608	65.5597	60	57.6068	61.2279	55.4325	58.2958	49.8397	58.364	52.6028	61.3823	58.1825	62.175	53.0931	43.2456	57.958	67.6128	71.4166	43.7898	69.8909	32.9538
1.98257	2.01197	1.77304	0.942464	1.1463	1.25519	1.5249	1.74282	1.76755	2.11897	1.77155	1.96817	1.75127	1.33266	1.39753	1.86172	2.24949	1.61205	1.0023	0.961381	1.54182	0.966613	3.2549
11.6129	18.7097	21.2903	41.9355	22.2581	19.6774	30.9677	13.5484	14.5161	16.129	17.7419	17.7419	15.4839	16.4516	19.3548	28.0645	22.9032	23.5484	45.4839	55.8065	76.7742	61.6129	11.9355
7.03349	9.33014	9.76077	27.9904	19.4258	12.2967	19.6172	8.80383	11.1962	9.52153	10.2392	10.6699	11.4354	12.4402	11.3397	10.0957	7.7512	13.11	12.8708	13.2536	15.0239	14.2584	5.50239
1.65109	2.00529	2.18121	1.49821	1.1458	1.60023	1.5786	1.53892	1.29653	1.69395	1.73274	1.66281	1.35403	1.32246	1.70682	2.77985	2.9548	1.79621	3.53388	4.21067	5.11013	4.32117	2.16914
